# Supplementary material
Source: publisher figshare collection journal article supplement (https://karger.figshare.com/ndownloader/files/37510297)

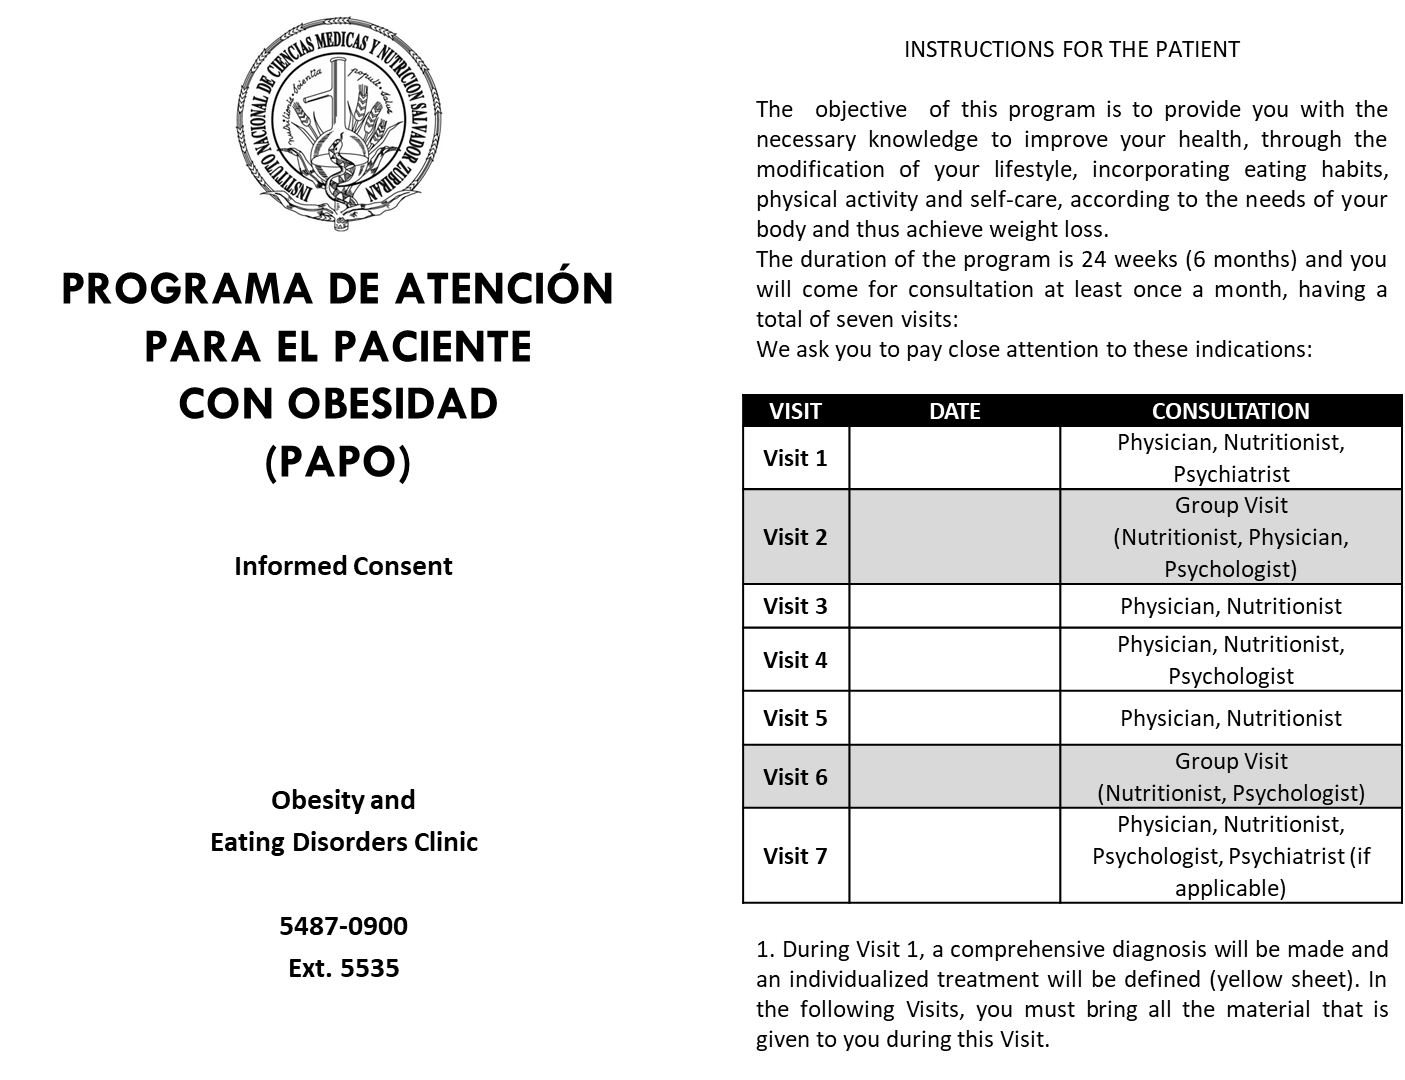


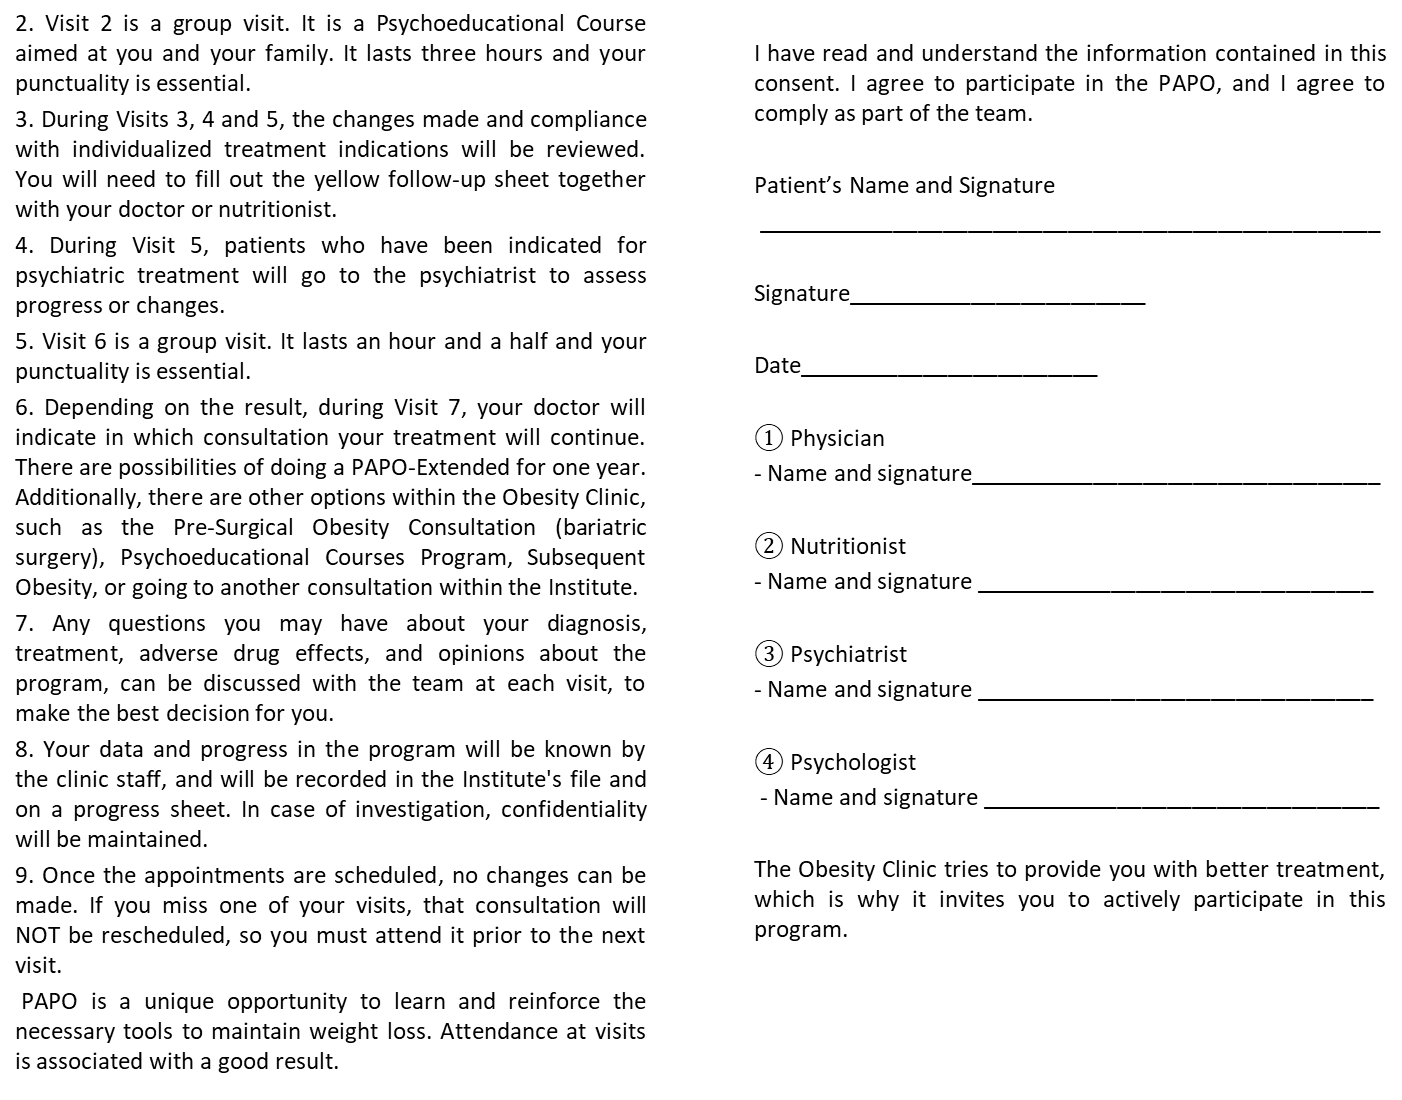


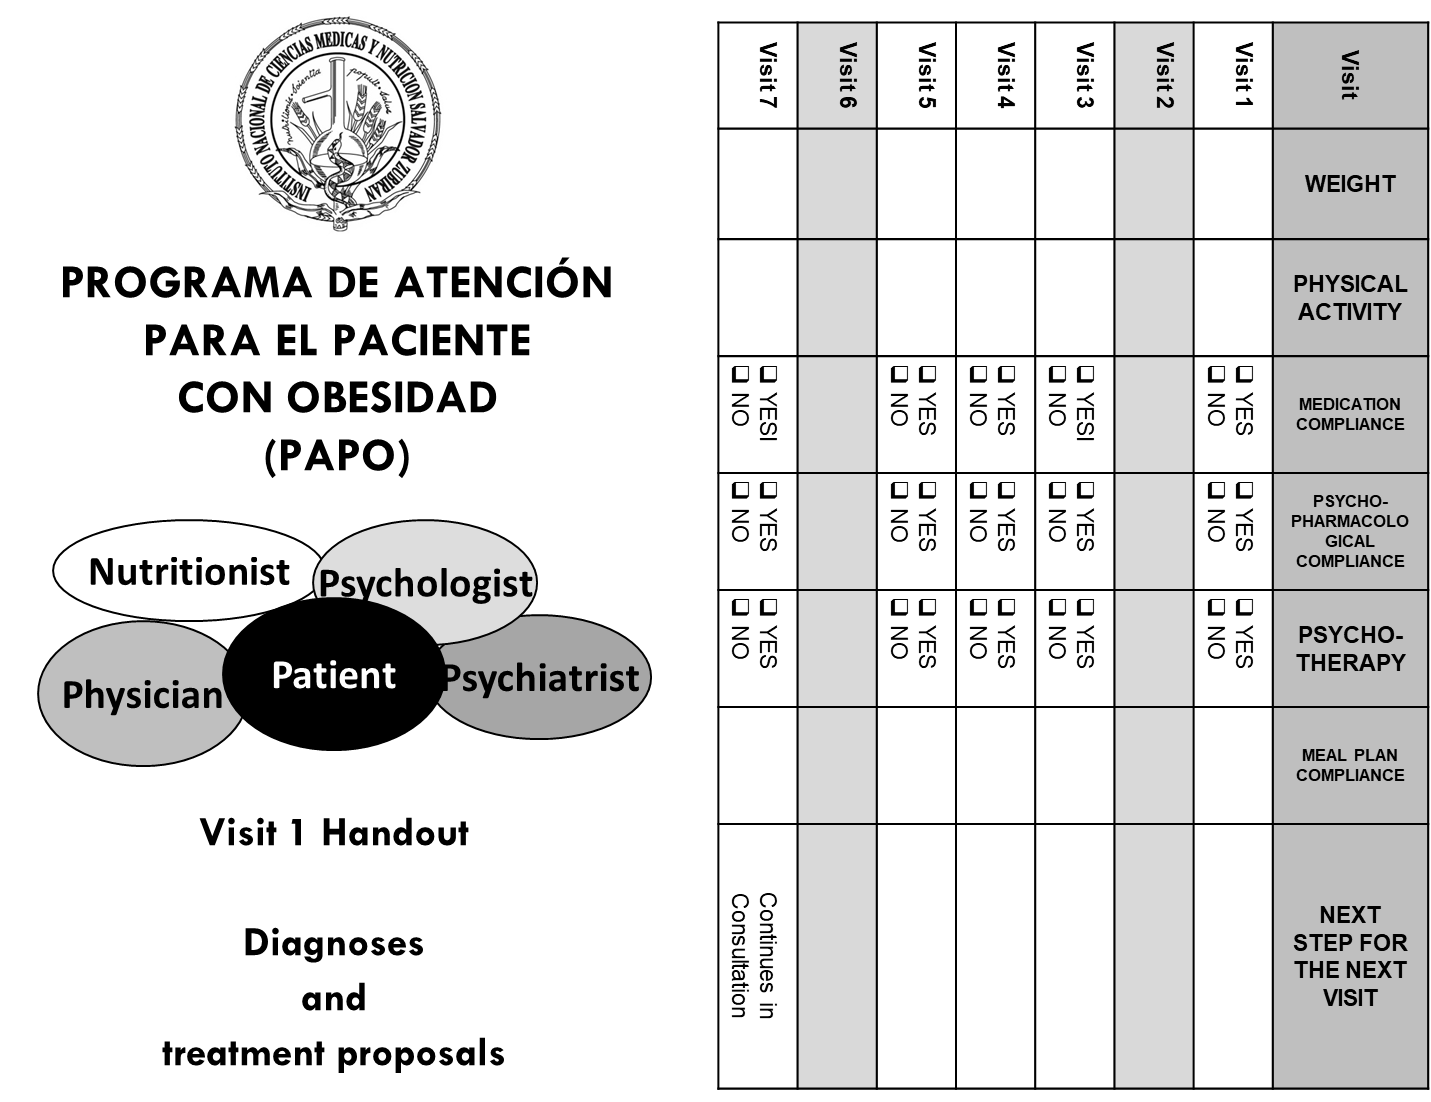


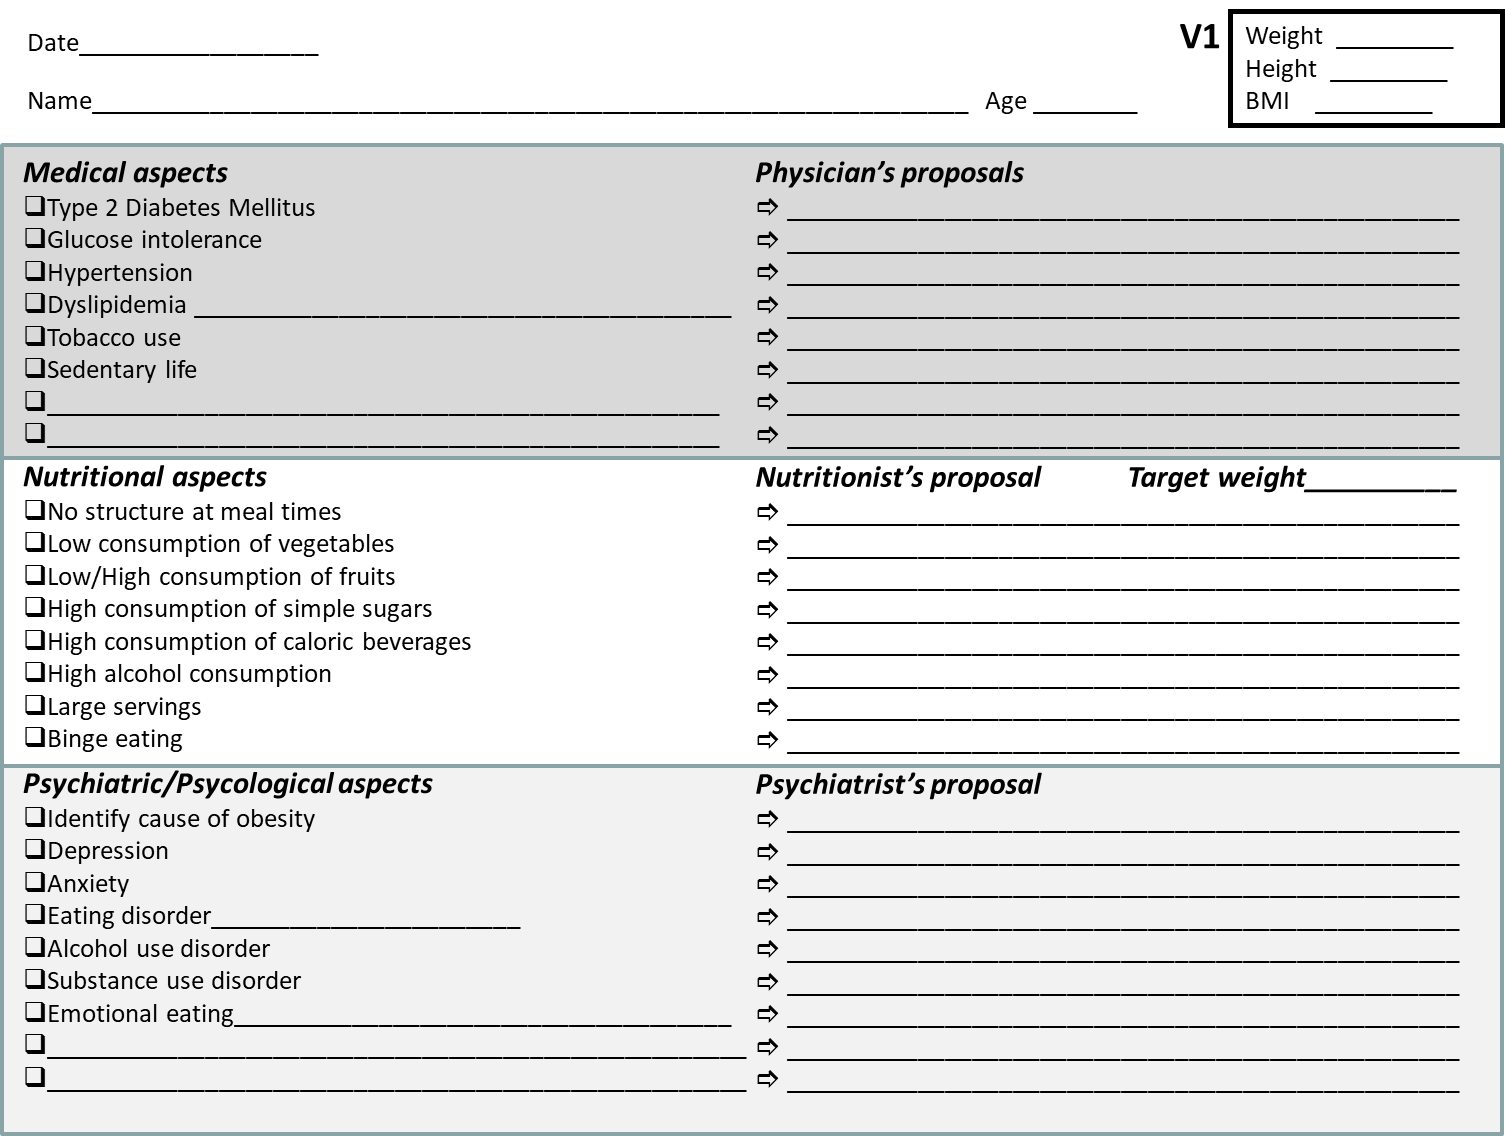

Supplement: Supplementary file 1 [file 37510297]
